# Supplementary material for: Elucidating Flavonoid and Antioxidant Activity in Edible and Medicinal Herbs Woodwardia japonica (L.f.) Sm. Based on HPLC-ESI-TOF-MS and Artificial Neural Network Model: Response to Climatic Factors
Source: MDPI journal article supplement (doi:10.3390/molecules28041985), 2023-02-20
Supplement: s1 [file s1]

Table S1 The Climate Factors of *Woodwardia japonica* Collected from Nine Main Production Areas

| No. | Sample Sites                                   | Habitat<br>Soil<br>Matrix | Average<br>Temperature(°C) <sup>a</sup> | Maximum<br>Temperature(°C) <sup>a</sup> | Minimum<br>Temperature(°C) <sup>a</sup> | Average<br>Precipitation(mm)<br><sup>a</sup> | Daytime<br>Precipitation(mm) <sup>a</sup> | Overnight<br>precipitation(mm) <sup>a</sup> | Sunshine<br>duration(h) <sup>a</sup> | Average relative<br>Humidity(%) <sup>a</sup> |
|-----|------------------------------------------------|---------------------------|-----------------------------------------|-----------------------------------------|-----------------------------------------|----------------------------------------------|-------------------------------------------|---------------------------------------------|--------------------------------------|----------------------------------------------|
| S1  | Wuyi Mountain<br>(Jiangxi Province)            | Soil                      | 31.21                                   | 45.80                                   | 24.08                                   | 213.65                                       | 213.20                                    | 426.85                                      | 5.80                                 | 81.77                                        |
| S2  | Qingyuan County<br>(Zhejiang<br>Province)      | Soil                      | 31.14                                   | 45.00                                   | 24.48                                   | 108.70                                       | 108.28                                    | 6.01                                        | 5.43                                 | 81.97                                        |
| S3  | Wuyuan County<br>(Jiangxi Province)            | Soil                      | 32.39                                   | 48.70                                   | 24.59                                   | 319.79                                       | 214.35                                    | 323.17                                      | 5.11                                 | 79.45                                        |
| S4  | Tianmu Mountain<br>(Zhejiang<br>Province)      | Soil                      | 31.15                                   | 47.07                                   | 24.00                                   | 108.49                                       | 214.63                                    | 112.15                                      | 6.49                                 | 87.39                                        |
| S5  | Huang Mountain<br>(Anhui Province)             | Sand                      | 28.61                                   | 41.11                                   | 22.94                                   | 0.71                                         | 213.77                                    | 109.00                                      | 6.40                                 | 76.68                                        |
| S6  | Longquan County<br>(Zhejiang<br>Province)      | Soil                      | 31.19                                   | 44.15                                   | 24.68                                   | 214.54                                       | 108.34                                    | 322.88                                      | 5.07                                 | 74.58                                        |
| S7  | Fengyang<br>Mountain<br>(Zhejiang<br>Province) | Dinas                     | 31.72                                   | 47.97                                   | 24.15                                   | 59.94                                        | 23.94                                     | 83.87                                       | 5.90                                 | 79.19                                        |
| S8  | Jianyang County<br>(Fujian Province)           | Humus                     | 31.62                                   | 47.76                                   | 24.45                                   | 319.36                                       | 318.86                                    | 321.77                                      | 5.66                                 | 81.35                                        |
| S9  | Wuyi Mountain<br>(Fujian Province)             | Soil                      | 31.52                                   | 48.81                                   | 23.90                                   | 109.11                                       | 214.73                                    | 7.38                                        | 4.36                                 | 78.65                                        |

<sup>a</sup>Monthly mean value

Table S2. Pearson Correlation Coefficients Between TFC, Antioxidant Activity of *W. japonica* and Climate Factors <sup>a</sup>

| Dependent variable/Independent variable      | AT     | MAT    | MIT    | AP     | DP     | OP     | SD     | ARH    |
|----------------------------------------------|--------|--------|--------|--------|--------|--------|--------|--------|
| Total flavonoid content                      | 0.139  | 0.258  | -0.092 | 0.206  | 0.317  | 0.208  | -0.302 | -0.049 |
| O <sup>2</sup> - radical scavenging activity | -0.007 | 0.135  | -0.196 | -0.055 | -0.098 | 0.051  | -0.066 | -0.442 |
| The reducing force on Fe <sup>3+</sup>       | 0.083  | 0.238  | -0.172 | 0.064  | 0.147  | 0.17   | -0.057 | -0.065 |
| DPPH radical scavenging activity             | -0.230 | -0.151 | -0.361 | -0.521 | -0.319 | -0.276 | 0.181  | 0.151  |
| ABTS radical scavenging activity             | 0.436  | 0.463  | 0.165  | -0.033 | -0.444 | 0.032  | 0.213  | 0.246  |

<sup>a</sup>|r|≥0.8: extremely high correlation; 0.6≤|r|<0.8: high correlation; 0.4≤|r|<0.6: medium correlation; 0.2≤|r|<0.4: low correlation; |r|<0.2 no correlation

Table S3. Pearson Correlation Coefficients between Flavonoid Type of *W. japonica* and Climate Factors <sup>a</sup>

|            | AT     | MAT    | MIT    | AP     | DP     | OP     | SD     | ARH    |
|------------|--------|--------|--------|--------|--------|--------|--------|--------|
| Compound 1 | 0.146  | -0.195 | 0.456  | 0.454  | 0.045  | 0.392  | -0.569 | -0.343 |
| Compound 2 | -0.137 | -0.028 | -0.409 | -0.149 | 0.083  | 0.248  | 0.332  | 0.231  |
| Compound 3 | -0.160 | -0.135 | -0.286 | 0.002  | 0.239  | 0.377  | 0.428  | 0.389  |
| Compound 4 | -0.274 | 0.022  | -0.640 | -0.521 | -0.027 | -0.228 | 0.249  | 0.100  |

|            |        |       |        |        |       |        |        |        |
|------------|--------|-------|--------|--------|-------|--------|--------|--------|
| Compound 5 | -0.158 | 0.011 | -0.453 | -0.205 | 0.077 | 0.038  | 0.104  | -0.015 |
| Compound 6 | 0.097  | 0.394 | -0.299 | -0.276 | 0.083 | -0.401 | -0.425 | -0.011 |
| Compound 7 | -0.005 | 0.033 | 0.011  | -0.130 | 0.048 | -0.098 | 0.423  | 0.582  |
| Compound 8 | 0.026  | 0.290 | -0.231 | -0.401 | 0.011 | -0.505 | 0.017  | 0.391  |

---

<sup>a</sup>|r|≥0.8: extremely high correlation; 0.6≤|r|<0.8: high correlation; 0.4≤|r|<0.6: medium correlation; 0.2≤|r|<0.4: low correlation; |r|<0.2 no correlation.

Compound 1-8: isotrifolin, rutin, myricetin deoxyhexoside, quercetin-3-rutinoside, luteolin, quercitrin, genestein G2, luteolin-4'-O-(6''-trans-caffeoyl)- $\alpha$ -D-glucopyranoside.
